# Supplementary material for: Isolation, contact and social behavior shaped genetic diversity in West Timor
Source: Springer Nature journal article supplement (doi:10.1038/jhg.2014.62), 2014-07-31
Supplement: 10038_2014_BFjhg201462_MOESM365_ESM.pdf [file 10038_2014_BFjhg201462_MOESM365_ESM.pdf]

**Supplementary Table 1: Molecular diversity indices for populations in West Timor based on Y chromosome STRs ( $n = 14$ )**

| Population     | N  | h  | S  | Diversity Indices   |       |      |      |                      |      |
|----------------|----|----|----|---------------------|-------|------|------|----------------------|------|
|                |    |    |    | Haplotype diversity | SD    | MNPD | SD   | Nucleotide diversity | SD   |
| Umaklaran      | 41 | 29 | 13 | 0.97                | 0.013 | 8.38 | 3.96 | 0.60                 | 0.31 |
| Fatuketi       | 35 | 26 | 13 | 0.98                | 0.011 | 6.72 | 3.25 | 0.48                 | 0.26 |
| Tialai         | 24 | 18 | 13 | 0.96                | 0.025 | 8.35 | 4.01 | 0.60                 | 0.32 |
| Raimanawe      | 50 | 32 | 13 | 0.96                | 0.017 | 7.53 | 3.58 | 0.54                 | 0.28 |
| Kamanasa       | 62 | 52 | 14 | 0.99                | 0.005 | 7.99 | 3.76 | 0.57                 | 0.30 |
| Kletek Rainan  | 17 | 15 | 13 | 0.99                | 0.025 | 8.80 | 4.27 | 0.63                 | 0.34 |
| Kletek Suai    | 15 | 11 | 13 | 0.95                | 0.040 | 7.70 | 3.80 | 0.55                 | 0.30 |
| Kletek Wefatuk | 15 | 14 | 13 | 0.99                | 0.028 | 7.60 | 3.76 | 0.54                 | 0.30 |
| Kateri         | 50 | 29 | 13 | 0.96                | 0.015 | 6.66 | 3.20 | 0.48                 | 0.25 |
| Laran          | 50 | 45 | 13 | 1.00                | 0.005 | 7.45 | 3.54 | 0.53                 | 0.28 |
| Kakaniuk       | 47 | 26 | 13 | 0.95                | 0.017 | 7.57 | 3.60 | 0.54                 | 0.29 |
| Umanen Lawalu  | 49 | 41 | 14 | 0.99                | 0.007 | 8.29 | 3.91 | 0.59                 | 0.31 |
| Besikama       | 42 | 32 | 13 | 0.98                | 0.012 | 8.52 | 4.02 | 0.61                 | 0.32 |

Abbreviations: N, number of sequences; h, number of haplotypes; S, number of polymorphic sites; MNPD, mean number of pairwise differences; SD, standard deviation.

**Supplementary Table 2: Y chromosome haplogroup frequencies (percentages) in West Timor**

|             | TIM_BS<br><i>n</i> =42 | TIM_FT<br><i>n</i> =35 | TIM_KM<br><i>n</i> =62 | TIM_KT<br><i>n</i> =50 | TIM_KK<br><i>n</i> =47 | TIM_KR<br><i>n</i> =17 | TIM_KS<br><i>n</i> =15 | TIM_KW<br><i>n</i> =15 | TIM_LR<br><i>n</i> =50 | TIM_RM<br><i>n</i> =50 | TIM_TI<br><i>n</i> =24 | TIM_UM<br><i>n</i> =41 | TIM_UL<br><i>n</i> =49 | TIMOR<br><i>n</i> =497 |
|-------------|------------------------|------------------------|------------------------|------------------------|------------------------|------------------------|------------------------|------------------------|------------------------|------------------------|------------------------|------------------------|------------------------|------------------------|
| C-RPS4Y     | 2.4                    |                        | 3.2                    |                        | 8.5                    | 11.8                   |                        | 6.7                    | 6.0                    | 4.0                    |                        | 12.2                   | 4.1                    | 4.4                    |
| C-M38       | 9.5                    | 37.1                   | 22.6                   | 46.0                   | 25.5                   | 23.5                   | 20.0                   | 53.3                   | 32.0                   | 24.0                   | 4.2                    | 17.1                   | 30.6                   | 26.6                   |
| C-P355      | 14.3                   | 28.6                   | 11.3                   | 12.0                   | 2.1                    | 5.9                    | 6.7                    |                        | 8.0                    | 24.0                   | 20.8                   | 4.9                    | 14.3                   | 12.5                   |
| C-M208      |                        |                        | 1.6                    |                        |                        |                        |                        |                        |                        |                        | 4.2                    |                        |                        | 0.4                    |
| C-P343      |                        | 2.9                    |                        |                        | 2.1                    |                        |                        |                        |                        |                        |                        |                        |                        | 0.4                    |
| D-M116      |                        |                        |                        |                        |                        |                        |                        |                        |                        |                        |                        | 2.4                    |                        | 0.2                    |
| E-P1        |                        |                        |                        |                        |                        |                        |                        | 2.0                    |                        |                        |                        |                        |                        | 0.2                    |
| F-P14*      |                        |                        |                        | 2.0                    | 2.1                    |                        |                        |                        |                        |                        | 20.8                   | 2.4                    | 2.0                    | 1.8                    |
| J-M172      |                        |                        | 1.6                    |                        |                        |                        |                        | 6.7                    |                        |                        |                        |                        |                        | 0.4                    |
| K-P397      | 9.5                    | 2.9                    | 19.4                   |                        | 4.3                    | 5.9                    |                        | 6.7                    | 14.0                   | 8.0                    | 16.7                   | 19.5                   | 10.2                   | 9.9                    |
| K-P79       | 2.4                    |                        |                        |                        |                        |                        |                        |                        |                        |                        |                        |                        |                        | 0.2                    |
| K-P336      |                        |                        |                        |                        |                        |                        |                        |                        |                        |                        |                        | 2.4                    |                        | 0.2                    |
| M-P34       | 9.5                    |                        | 12.9                   | 2.0                    |                        | 17.6                   | 13.3                   | 6.7                    | 2.0                    | 2.0                    |                        | 17.1                   | 6.1                    | 6.2                    |
| O-P201      | 4.8                    |                        | 14.5                   | 2.0                    | 4.3                    |                        |                        |                        | 2.0                    | 2.0                    |                        |                        | 2.0                    | 3.4                    |
| O-JST002611 | 2.4                    |                        |                        |                        |                        | 5.9                    |                        |                        |                        |                        |                        |                        |                        | 0.4                    |
| O-M134      |                        | 5.7                    |                        |                        | 2.1                    |                        |                        |                        | 2.0                    | 2.0                    |                        |                        |                        | 1.0                    |
| O-M119      | 11.9                   | 2.9                    |                        | 2.0                    | 4.3                    |                        |                        |                        | 2.0                    |                        | 4.2                    |                        | 2.0                    | 2.4                    |
| O-P203      |                        | 2.9                    |                        |                        |                        |                        |                        |                        | 4.0                    |                        |                        | 7.3                    |                        | 1.2                    |
| O-M110      | 9.5                    | 8.6                    | 1.6                    | 18.0                   | 12.8                   |                        | 6.7                    | 6.7                    | 10.0                   | 6.0                    | 8.3                    | 4.9                    | 6.1                    | 8.0                    |
| O-M95       |                        |                        |                        | 2.0                    |                        |                        | 6.7                    |                        | 2.0                    | 2.0                    |                        |                        |                        | 0.8                    |
| P-P295      | 4.8                    | 8.6                    | 4.8                    | 14.0                   | 25.5                   | 5.9                    | 6.7                    | 6.7                    | 10.0                   | 18.0                   | 16.7                   | 2.4                    | 10.2                   | 10.9                   |
| Q-P36       |                        |                        |                        |                        |                        |                        |                        |                        |                        |                        |                        |                        | 2.0                    | 0.2                    |
| S-M254      | 14.3                   |                        | 4.8                    |                        |                        | 11.8                   | 40.0                   | 6.7                    | 2.0                    | 8.0                    | 4.2                    | 7.3                    | 6.1                    | 6.0                    |
| S-P377      | 4.8                    |                        | 1.6                    |                        | 6.4                    | 11.8                   |                        |                        | 2.0                    |                        |                        |                        | 4.1                    | 2.2                    |

Populations: TIM\_BS: Besikama; TIM\_FT: Fatuketi; TIM\_KM: Kamanasa; TIM\_KT: Kateri; TIM\_KK: Kakaniuk; TIM\_KR: Kletek Rainan; TIM\_KS: Kletek Suai; TIM\_KW: Kletek Wefatuk; TIM\_LR: Laran; TIM\_RM: Raimanawe; TIM\_TI: Tialai; TIM\_UM: Umaklaran; TIM\_UL: Umanen Lawalu.

**Supplementary Table 3: Regional Y chromosome haplogroup frequencies (percentages) in West Timor and surrounding islands**

|         | TIM<br><i>n</i> =497 | SUM<br><i>n</i> =649 | FLO<br><i>n</i> =394 | LEM<br><i>n</i> =92 | SLW<br><i>n</i> =177 | PAN<br><i>n</i> =26 | ALO<br><i>n</i> =22 | MAL<br><i>n</i> =30 | BLI<br><i>n</i> =502 | TAB<br><i>n</i> =48 | PHI<br><i>n</i> =47 | PNG<br><i>n</i> =48 | MEL<br><i>n</i> =70 | AUS<br><i>n</i> =40 |
|---------|----------------------|----------------------|----------------------|---------------------|----------------------|---------------------|---------------------|---------------------|----------------------|---------------------|---------------------|---------------------|---------------------|---------------------|
| C-RPS4Y | 4.4                  | 1.2                  | 25.4                 | 3.3                 | 7.3                  |                     | 4.5                 |                     | 1.8                  |                     |                     | 2.1                 |                     |                     |
| C-M38   | 26.6                 | 49.5                 | 5.8                  | 4.3                 | 4.0                  | 7.7                 | 18.2                | 16.7                |                      |                     |                     | 6.3                 | 12.9                |                     |
| C-P355  | 12.5                 | 1.5                  | 9.1                  | 17.4                | 0.6                  | 3.8                 | 36.4                | 16.7                |                      |                     |                     |                     |                     |                     |
| C-M208  | 0.4                  |                      |                      |                     |                      |                     |                     |                     |                      |                     |                     | 2.1                 | 1.4                 |                     |
| C-P343  | 0.4                  |                      | 4.3                  | 17.4                |                      | 3.8                 |                     |                     |                      |                     |                     |                     |                     |                     |
| C-M347  |                      |                      |                      |                     |                      |                     |                     |                     |                      |                     |                     |                     |                     | 55.0                |
| C-M217  |                      |                      |                      |                     |                      |                     |                     |                     |                      | 2.1                 | 2.1                 |                     |                     |                     |
| D-M116  | 0.2                  |                      |                      |                     |                      |                     |                     |                     |                      |                     |                     |                     |                     |                     |
| E-P1    | 0.2                  |                      |                      |                     |                      |                     |                     |                     |                      |                     |                     |                     |                     |                     |
| F-P14*  | 1.8                  | 0.2                  | 1.5                  | 5.4                 | 2.3                  |                     |                     |                     |                      |                     |                     |                     |                     |                     |
| H-M69   |                      |                      |                      |                     |                      |                     |                     |                     | 3.4                  |                     |                     |                     |                     |                     |
| H-Apt   |                      |                      |                      |                     | 1.1                  |                     |                     |                     |                      |                     |                     |                     |                     |                     |
| J-M304  |                      |                      |                      |                     |                      |                     |                     |                     | 0.2                  |                     |                     |                     |                     |                     |
| J-M172  | 0.4                  |                      |                      |                     | 0.6                  |                     |                     |                     |                      |                     |                     |                     |                     |                     |
| J-M12   |                      |                      |                      |                     |                      |                     |                     |                     | 0.4                  |                     |                     |                     |                     |                     |
| K-M526* |                      |                      |                      |                     | 0.6                  |                     |                     |                     |                      |                     |                     |                     |                     |                     |
| K-P261  |                      |                      |                      |                     |                      |                     |                     |                     | 1.0                  |                     |                     |                     |                     |                     |
| K-P397  | 9.9                  | 4.5                  | 6.1                  | 3.3                 | 5.1                  | 3.8                 | 4.5                 | 16.7                |                      |                     |                     | 6.3                 | 1.4                 |                     |
| K-P405  |                      | 0.3                  |                      |                     |                      |                     |                     |                     |                      |                     |                     |                     |                     |                     |
| K-P60   |                      |                      |                      |                     |                      |                     |                     |                     |                      |                     |                     |                     |                     | 45.0                |
| K-P79   | 0.2                  |                      |                      |                     |                      |                     |                     |                     |                      |                     |                     | 4.2                 | 8.6                 |                     |
| K-P315  |                      |                      |                      |                     |                      |                     |                     |                     |                      |                     |                     | 2.1                 | 8.6                 |                     |
| K-P336  | 0.2                  |                      |                      |                     |                      |                     | 22.7                |                     |                      |                     |                     |                     |                     |                     |
| K-P378  |                      |                      |                      |                     |                      |                     |                     |                     |                      | 31.9                |                     |                     |                     |                     |
| L-M20   |                      |                      |                      |                     | 1.1                  |                     |                     |                     | 2.4                  |                     |                     |                     |                     |                     |



Populations: TIM: Timor; SUM: Sumba; FLO: Flores; LEM: Lembata; ALR: Alor; PTR: Pantar; SLW: Sulawesi; MAL: Maluku; BLI: Bali; TAB: Taiwanese Aboriginals; PHIL: Philippines; PNG: Papua New Guinea; MEL: Melanesia; AUS: Australia. All data, except Timor, from Karafet and colleagues<sup>14</sup>.

**Supplementary Table 4: mtDNA haplogroup frequencies (percentages) in West Timor**

|         | TIM_BS<br><i>n</i> =42 | TIM_FT<br><i>n</i> =35 | TIM_KM<br><i>n</i> =67 | TIM_KT<br><i>n</i> =50 | TIM_KK<br><i>n</i> =49 | TIM_KR<br><i>n</i> =31 | TIM_KS<br><i>n</i> =20 | TIM_KW<br><i>n</i> =20 | TIM_LR<br><i>n</i> =50 | TIM_RM<br><i>n</i> =50 | TIM_TI<br><i>n</i> =24 | TIM_UM<br><i>n</i> =41 | TIM_UL<br><i>n</i> =50 | TIMOR<br><i>n</i> =529 |
|---------|------------------------|------------------------|------------------------|------------------------|------------------------|------------------------|------------------------|------------------------|------------------------|------------------------|------------------------|------------------------|------------------------|------------------------|
| B4a     | 7.1                    | 17.1                   | 7.5                    | 4.0                    | 2.0                    | 45.2                   | 15.0                   | 15.0                   | 6.0                    | 8.0                    | 20.8                   |                        | 4.0                    | 9.6                    |
| B4a1a1a | 2.4                    |                        | 6.0                    | 36.0                   | 2.0                    |                        | 5.0                    |                        | 18.0                   | 6.0                    |                        |                        | 4.0                    | 7.4                    |
| B4b1    |                        | 2.9                    | 3.0                    | 2.0                    | 2.0                    |                        | 25.0                   | 15.0                   | 6.0                    |                        |                        | 2.4                    | 4.0                    | 3.6                    |
| B4c1b3  | 2.4                    |                        | 3.0                    |                        |                        |                        |                        |                        | 2.0                    |                        |                        |                        | 2.0                    | 0.9                    |
| B4c2    | 7.1                    |                        |                        |                        |                        |                        |                        |                        |                        |                        |                        |                        |                        | 0.6                    |
| B5a     |                        |                        |                        |                        |                        | 3.2                    |                        | 15.0                   |                        |                        |                        |                        |                        | 0.8                    |
| B5b1    |                        |                        | 6.0                    |                        |                        |                        |                        |                        | 2.0                    | 2.0                    |                        | 4.9                    |                        | 1.5                    |
| D       |                        |                        | 3.0                    | 4.0                    |                        |                        |                        |                        |                        |                        |                        |                        |                        | 0.8                    |
| D4      |                        | 5.7                    |                        |                        |                        |                        |                        |                        |                        |                        |                        |                        |                        | 0.4                    |
| D5      |                        |                        | 1.5                    |                        |                        |                        |                        |                        |                        |                        |                        |                        |                        | 0.2                    |
| D5b1c   | 2.4                    |                        | 3.0                    | 22.0                   |                        |                        |                        |                        |                        |                        |                        |                        |                        | 2.6                    |
| E       |                        | 2.9                    | 7.5                    |                        |                        |                        | 5.0                    |                        | 4.0                    | 8.0                    | 8.3                    |                        | 2.0                    | 3.0                    |
| E1a1a   | 16.7                   | 17.1                   | 1.5                    | 6.0                    | 4.1                    | 9.7                    |                        | 5.0                    | 6.0                    | 2.0                    |                        |                        | 4.0                    | 5.5                    |
| E1b     | 9.5                    | 11.4                   | 7.5                    |                        |                        | 12.9                   |                        | 5.0                    | 8.0                    | 4.0                    | 20.8                   | 12.2                   |                        | 6.4                    |
| E2      | 2.4                    |                        |                        |                        |                        |                        | 5.0                    |                        |                        |                        |                        |                        |                        | 0.4                    |
| F1a     |                        |                        | 1.5                    |                        |                        |                        |                        | 5.0                    | 2.0                    |                        |                        |                        | 2.0                    | 0.8                    |
| F1a3    |                        |                        | 1.5                    |                        |                        |                        |                        |                        | 18.0                   | 2.0                    | 4.2                    |                        | 6.0                    | 2.8                    |
| F1a4    | 16.7                   | 2.9                    | 13.4                   | 8.0                    | 53.1                   | 6.5                    | 30.0                   | 30.0                   |                        | 18.0                   | 16.7                   | 9.8                    | 48.0                   | 19.3                   |
| F3      |                        |                        |                        |                        |                        |                        |                        | 5.0                    | 2.0                    |                        |                        |                        | 4.0                    | 0.8                    |
| M*      | 4.8                    | 2.9                    | 3.0                    | 2.0                    |                        |                        |                        |                        | 2.0                    | 8.0                    | 4.2                    | 12.2                   |                        | 3.2                    |
| M7      |                        |                        |                        |                        |                        |                        |                        |                        |                        |                        |                        | 2.4                    |                        | 0.2                    |
| M7c3    | 2.4                    |                        |                        | 8.0                    |                        | 3.2                    |                        |                        |                        | 4.0                    |                        | 4.9                    |                        | 1.9                    |
| M7c3c   |                        | 2.9                    | 10.4                   |                        | 14.3                   |                        | 5.0                    | 5.0                    | 4.0                    | 14.0                   |                        | 9.8                    | 2.0                    | 5.9                    |
| N*      | 2.4                    | 5.7                    |                        |                        |                        |                        |                        |                        |                        | 2.0                    |                        |                        |                        | 0.8                    |
| N9a     | 7.1                    |                        | 1.5                    | 2.0                    |                        | 6.5                    |                        |                        |                        |                        |                        |                        | 4.0                    | 1.7                    |

|      |     |      |      |     |      |     |     |      |      |      |      |      |      |
|------|-----|------|------|-----|------|-----|-----|------|------|------|------|------|------|
| P*   | 2.4 |      | 4.5  |     | 2.0  |     |     |      |      |      |      |      | 0.9  |
| Q    | 2.4 |      |      |     |      | 3.2 | 5.0 |      | 2.0  |      | 2.4  |      | 0.9  |
| Q1   | 9.5 | 25.7 | 14.9 | 4.0 | 18.4 | 6.5 |     | 14.0 | 16.0 | 25.0 | 29.3 | 10.0 | 14.0 |
| R*   |     |      |      | 2.0 |      | 3.2 |     |      |      |      |      |      | 0.4  |
| R9c1 | 2.4 | 2.9  |      |     |      |     |     | 2.0  | 4.0  |      | 9.8  | 4.0  | 2.1  |
| Y2   |     |      |      |     | 2.0  |     | 5.0 | 4.0  |      |      |      |      | 0.8  |

\* Mitochondrial paragroups: Individuals were not assigned to any derived haplogroup.

Populations: TIM\_BS: Besikama; TIM\_FT: Fatuketi; TIM\_KM: Kamanasa; TIM\_KT: Kateri; TIM\_KK: Kakaniuk; TIM\_KR: Kletek Rainan; TIM\_KS: Kletek Suai; TIM\_KW: Kletek Wefatuk; TIM\_LR: Laran; TIM\_RM: Raimanawe; TIM\_TI: Tialai; TIM\_UM: Umaklaran; TIM\_UL: Umanen Lawalu.

**Supplementary Table 5: Regional mtDNA haplogroup frequencies (percentages) in West Timor and surrounding islands**

|         | TIM<br>Present<br>Study<br><i>n</i> =529 | SUM<br>Tumong<br>gor et al,<br>2013 <sup>6</sup><br><i>n</i> =639 | FLO<br>Tumong<br>gor et al,<br>2013 <sup>6</sup><br><i>n</i> =453 | LEM<br>Tumong<br>gor et al,<br>2013 <sup>6</sup><br><i>n</i> =92 | ALR<br>Tumong<br>gor et al,<br>2013 <sup>6</sup><br><i>n</i> =23 | PTR<br>Tumong<br>gor et al,<br>2013 <sup>6</sup><br><i>n</i> =27 | SLW<br>Tumong<br>gor et al,<br>2013 <sup>6</sup><br><i>n</i> =188 | MAL<br>Hill et<br>al,<br>2007 <sup>58</sup><br><i>n</i> =43 | BLI<br>Tumong<br>gor et al,<br>2013 <sup>6</sup><br><i>n</i> =457 | TAB<br>Tabbada<br>et al,<br>2010 <sup>41</sup><br><i>n</i> =640 | PHIL<br>Tabbada<br>et al,<br>2010 <sup>41</sup><br><i>n</i> =423 | PNG<br>Friedlaen<br>der et al,<br>2007 <sup>42</sup><br><i>n</i> =231 | MEL<br>Friedlaen<br>der et al,<br>2007 <sup>42</sup><br><i>n</i> =607 | AUS<br>Hudjasov<br>et al,<br>2007 <sup>45</sup><br><i>n</i> =38 |
|---------|------------------------------------------|-------------------------------------------------------------------|-------------------------------------------------------------------|------------------------------------------------------------------|------------------------------------------------------------------|------------------------------------------------------------------|-------------------------------------------------------------------|-------------------------------------------------------------|-------------------------------------------------------------------|-----------------------------------------------------------------|------------------------------------------------------------------|-----------------------------------------------------------------------|-----------------------------------------------------------------------|-----------------------------------------------------------------|
| B       |                                          | 0.3                                                               | 0.2                                                               |                                                                  |                                                                  |                                                                  |                                                                   |                                                             | 0.4                                                               |                                                                 |                                                                  |                                                                       |                                                                       |                                                                 |
| B4a     | 9.6                                      | 5.8                                                               | 4.9                                                               | 13                                                               | 13                                                               |                                                                  | 8                                                                 | 9.3                                                         | 2.4                                                               | 8.7                                                             | 11.8                                                             | 19.0                                                                  | 16.0                                                                  |                                                                 |
| B4a1a1a | 7.4                                      | 0.6                                                               |                                                                   |                                                                  |                                                                  |                                                                  |                                                                   | 14                                                          | 0.4                                                               |                                                                 |                                                                  |                                                                       |                                                                       |                                                                 |
| B4b1    | 3.6                                      | 5.6                                                               | 2.9                                                               | 3.3                                                              | 4.3                                                              |                                                                  | 4.3                                                               | 4.7                                                         |                                                                   | 6                                                               | 7.6                                                              |                                                                       | 0.3                                                                   |                                                                 |
| B4c1b3  | 0.9                                      | 4                                                                 | 0.3                                                               |                                                                  |                                                                  |                                                                  | 14.8                                                              | 10.6                                                        |                                                                   | 4.9                                                             | 5                                                                |                                                                       |                                                                       |                                                                 |
| B4c2    | 0.6                                      | 0.2                                                               | 1.2                                                               |                                                                  |                                                                  |                                                                  |                                                                   |                                                             | 7.4                                                               |                                                                 |                                                                  |                                                                       |                                                                       |                                                                 |
| B5a     | 0.8                                      | 3.1                                                               | 4                                                                 | 1.1                                                              |                                                                  |                                                                  |                                                                   | 7                                                           | 18.4                                                              | 5.9                                                             | 0.7                                                              |                                                                       |                                                                       |                                                                 |
| B5b1    | 1.5                                      | 5.6                                                               | 2.6                                                               | 1.1                                                              | 4.3                                                              |                                                                  |                                                                   | 1.1                                                         |                                                                   |                                                                 | 7.8                                                              |                                                                       |                                                                       |                                                                 |
| D       | 0.8                                      | 2                                                                 | 3.8                                                               |                                                                  |                                                                  |                                                                  |                                                                   | 0.5                                                         | 4.7                                                               |                                                                 |                                                                  |                                                                       |                                                                       |                                                                 |
| D4      | 0.4                                      |                                                                   |                                                                   |                                                                  |                                                                  |                                                                  |                                                                   |                                                             |                                                                   |                                                                 |                                                                  |                                                                       |                                                                       |                                                                 |
| D5      | 0.2                                      | 1.4                                                               | 1.8                                                               | 1.1                                                              |                                                                  |                                                                  |                                                                   | 1.6                                                         | 2.3                                                               | 4.8                                                             |                                                                  |                                                                       |                                                                       |                                                                 |
| D5b1c   | 2.6                                      | 4.2                                                               | 1.5                                                               | 3.3                                                              |                                                                  |                                                                  |                                                                   |                                                             |                                                                   |                                                                 |                                                                  |                                                                       |                                                                       |                                                                 |
| E       | 3.0                                      | 1.4                                                               | 1.8                                                               |                                                                  |                                                                  |                                                                  |                                                                   | 2.7                                                         |                                                                   | 2.3                                                             |                                                                  |                                                                       |                                                                       |                                                                 |
| E1a1a   | 5.5                                      | 3                                                                 | 2.4                                                               | 8.7                                                              | 8.7                                                              | 3.7                                                              | 18.1                                                              | 4.7                                                         | 2.4                                                               | 6.9                                                             | 11.1                                                             | 0.4                                                                   | 1.2                                                                   |                                                                 |
| E1b     | 6.4                                      | 4.7                                                               | 1.1                                                               | 1.1                                                              | 4.3                                                              | 3.7                                                              | 6.9                                                               |                                                             | 0.7                                                               |                                                                 | 1.4                                                              | 0.4                                                                   | 9.1                                                                   |                                                                 |
| E2      | 0.4                                      | 3.3                                                               | 3.1                                                               |                                                                  |                                                                  |                                                                  | 5.9                                                               | 4.7                                                         | 1.1                                                               | 2.8                                                             | 3.3                                                              | 0.4                                                                   | 0.2                                                                   |                                                                 |
| F1a     | 0.8                                      | 3.8                                                               | 0.2                                                               |                                                                  |                                                                  |                                                                  |                                                                   |                                                             | 1.8                                                               | 2.2                                                             |                                                                  |                                                                       |                                                                       |                                                                 |
| F1a1    |                                          | 1.3                                                               | 2.4                                                               | 2.2                                                              |                                                                  |                                                                  |                                                                   | 0.5                                                         | 2.3                                                               | 3.9                                                             | 0.2                                                              |                                                                       |                                                                       |                                                                 |
| F1a3    | 2.8                                      | 5.5                                                               | 5.3                                                               | 2.2                                                              |                                                                  |                                                                  |                                                                   | 2.1                                                         | 7                                                                 |                                                                 | 3.1                                                              |                                                                       |                                                                       |                                                                 |
| F1a4    | 19.3                                     | 4.7                                                               | 3.8                                                               | 14.1                                                             | 13                                                               |                                                                  |                                                                   | 2.7                                                         | 4.7                                                               |                                                                 | 4.3                                                              |                                                                       |                                                                       |                                                                 |
| F1ac    |                                          |                                                                   | 2                                                                 |                                                                  |                                                                  |                                                                  |                                                                   | 1.1                                                         |                                                                   |                                                                 |                                                                  |                                                                       |                                                                       |                                                                 |
| F3      | 0.8                                      | 0.6                                                               |                                                                   |                                                                  |                                                                  |                                                                  |                                                                   |                                                             |                                                                   |                                                                 | 1.9                                                              |                                                                       |                                                                       |                                                                 |
| M*      | 3.2                                      | 8.3                                                               | 14.7                                                              | 2.2                                                              | 8.7                                                              | 14.8                                                             | 6.9                                                               | 2.3                                                         | 10.7                                                              |                                                                 |                                                                  |                                                                       |                                                                       |                                                                 |
| M7      | 0.2                                      |                                                                   |                                                                   |                                                                  |                                                                  |                                                                  |                                                                   |                                                             | 2.3                                                               |                                                                 |                                                                  |                                                                       |                                                                       |                                                                 |
| M7b     |                                          | 1.4                                                               | 0.7                                                               |                                                                  |                                                                  |                                                                  |                                                                   |                                                             | 2.3                                                               |                                                                 | 0.2                                                              |                                                                       |                                                                       |                                                                 |





---

\* Mitochondrial paragroups: Individuals were not assigned to any derived haplogroup.

Populations: TIM: Timor; SUM: Sumba; FLO: Flores; LEM: Lembata; ALR: Alor; PTR: Pantar; SLW: Sulawesi; MAL: Maluku; BLI: Bali; TAB: Taiwanese Aboriginals; PHIL: Philippines; PNG: Papua New Guinea; MEL: Melanesia; AUS: Australia.

**Supplementary Table 6: Standardized genetic distances in West Timor ( $G'_{ST}$ )**

|                            | Number of Subpopulations | $G'_{ST}$   |           |       |       |
|----------------------------|--------------------------|-------------|-----------|-------|-------|
|                            |                          | mtDNA HVS I | mtDNA SNP | Y STR | Y SNP |
| All Indonesian populations | 70                       | 0.86        | 0.57      | 0.97  | 0.79  |
| Timor                      | 13                       | 0.69        | 0.42      | 0.72  | 0.24  |

**Supplementary Table 7: Mantel tests for genetic, linguistic and geographic associations  
(Based on seven populations in Timor that are primarily monolingual)**

| <b>Correlation</b>                            | <b><i>r</i><br/>(correlation<br/>coefficient)</b> | <b><i>P</i></b> |
|-----------------------------------------------|---------------------------------------------------|-----------------|
| <b>Full correlation</b>                       |                                                   |                 |
| mtDNA HVS1 Slatkin and geography              | 0.12                                              | 0.27            |
| mtDNA HVS1 Slatkin and language               | 0.13                                              | 0.37            |
| mtDNA SNP Slatkin and geography               | 0.12                                              | 0.31            |
| mtDNA SNP Slatkin and language                | 0.15                                              | 0.31            |
| YSTR Slatkin and geography                    | 0.36                                              | 0.097           |
| YSTR Slatkin and language                     | 0.24                                              | 0.19            |
| Y SNP Slatkin and geography                   | 0.43                                              | 0.08            |
| Y SNP Slatkin and language                    | -0.31                                             | 0.90            |
| Geography and language                        | 0.02                                              | 0.43            |
| <b>Partial correlation</b>                    |                                                   |                 |
| mtDNA HVS1 Slatkin and geography (language*)  | 0.12                                              | 0.29            |
| mtDNA HVS1 Slatkin and language (geography *) | 0.13                                              | 0.37            |
| mtDNA SNP Slatkin and geography (language*)   | 0.12                                              | 0.31            |
| mtDNA SNP Slatkin and language (geography*)   | 0.15                                              | 0.34            |
| YSTR Slatkin and geography (language*)        | 0.36                                              | 0.12            |
| YSTR Slatkin and language (geography*)        | 0.25                                              | 0.19            |
| Y SNP Slatkin and geography (language*)       | 0.46                                              | 0.057           |
| Y SNP Slatkin and language (geography*)       | -0.35                                             | 0.93            |
| Geography and language (HVS1 Slatkin*)        | 0.0051                                            | 0.46            |
| Geography and language (mtDNA SNP Slatkin*)   | 0.0027                                            | 0.46            |
| Geography and language (YSTR Slatkin*)        | -0.071                                            | 0.57            |
| Geography and language (Y SNP Slatkin*)       | 0.18                                              | 0.26            |

\* Indicates constrained parameter.

**Supplementary Table 8: Asian admixture rates in Indonesia and surrounding islands (Cox and colleagues<sup>9</sup>; Timor data is from the present study)**

| Region    | Location             | Population     | Asian Admixture |             |             | Difference  |
|-----------|----------------------|----------------|-----------------|-------------|-------------|-------------|
|           |                      |                | All             | A           | X           |             |
| ISEA      | Taiwan               | Aboriginal     | 1.00            | 1.00        | 1.00        | 0           |
|           | Philippines          | Filipino       | 1.00            | 1.00        | 1.00        | 0           |
| Indonesia | Sumatra              | Toba           | 1.00            | 1.00        | 1.00        | 0           |
|           | Nias                 | Nias           | 1.00            | 1.00        | 1.00        | 0           |
|           | Mentawai             | Mentawai       | 1.00            | 1.00        | 1.00        | 0           |
|           | Java                 | Dieng          | 0.98            | 0.96        | 1.00        | 0.04        |
|           | Java                 | Javanese       | 1.00            | 1.00        | 1.00        | 0           |
|           | Borneo               | Borneo         | 1.00            | 0.99        | 1.00        | 0.01        |
|           | Bali                 | Bali           | 0.99            | 0.95        | 1.00        | 0.04        |
|           | Sulawesi             | Sulawesi       | 0.97            | 0.91        | 0.99        | 0.08        |
|           | Flores/Lembata       | Flores/Lembata | 0.66            | 0.62        | 0.69        | 0.08        |
|           | Sumba                | Sumba          | 0.81            | 0.74        | 0.86        | 0.12        |
|           | Alor                 | Alor           | 0.51            | 0.49        | 0.54        | 0.04        |
|           | <b>Timor</b>         | <b>Timor</b>   | <b>0.64</b>     | <b>0.58</b> | <b>0.70</b> | <b>0.12</b> |
| Melanesia | PNG                  | Coastal        | 0.14            | 0.13        | 0.16        | 0.03        |
|           | Bismarck Archipelago | New Britain    | 0               | 0           | 0           | 0           |
|           | Bougainville         | Nasioi         | 0               | 0           | 0           | 0           |
|           | Vanuatu              | Maewo          | 0.06            | 0.02        | 0.14        | 0.12        |

**Supplementary Table 9: Asian admixture rates in West Timor populations**

| Region    | Location | Population     | Asian Admixture |             |             | Difference  |
|-----------|----------|----------------|-----------------|-------------|-------------|-------------|
|           |          |                | All             | A           | X           |             |
| Indonesia | Timor    | Besikama       | 0.65            | 0.59        | 0.71        | 0.12        |
|           |          | Fatuketi       | 0.64            | 0.59        | 0.69        | 0.10        |
|           |          | Kakaniuk       | 0.67            | 0.58        | 0.74        | 0.16        |
|           |          | Kamanasa       | 0.62            | 0.54        | 0.69        | 0.15        |
|           |          | Kateri         | 0.61            | 0.56        | 0.66        | 0.10        |
|           |          | Kletek Rainan  | 0.63            | 0.59        | 0.67        | 0.08        |
|           |          | Kletek Suai    | 0.63            | 0.58        | 0.67        | 0.09        |
|           |          | Kletek Wefatuk | 0.72            | 0.66        | 0.77        | 0.11        |
|           |          | Laran          | 0.62            | 0.57        | 0.67        | 0.10        |
|           |          | Reinawe        | 0.63            | 0.57        | 0.68        | 0.11        |
|           |          | Tialai         | 0.62            | 0.59        | 0.65        | 0.06        |
|           |          | Umaklaran      | 0.63            | 0.57        | 0.68        | 0.11        |
|           |          | Umanen Lawalu  | 0.68            | 0.58        | 0.78        | 0.20        |
|           |          | Mean           |                 | <i>0.64</i> | <i>0.58</i> | <i>0.70</i> |

**Supplementary Table 10: Tentative estimates of the Time of the Most Recent Common Ancestor (TMRCA) of selected mitochondrial DNA haplogroups inferred from the  $\rho$  statistic within Indonesia and major surrounding islands**

| Locations                        | mtDNA Haplogroup E1a1a |                  | mtDNA Haplogroup F1a4 |                  | mtDNA Haplogroup P  |                  | mtDNA Haplogroup Q |                  |
|----------------------------------|------------------------|------------------|-----------------------|------------------|---------------------|------------------|--------------------|------------------|
|                                  | Years BP $\pm$ SD      | $\rho \pm$ SD    | Years BP $\pm$ SD     | $\rho \pm$ SD    | Years BP $\pm$ SD   | $\rho \pm$ SD    | Years BP $\pm$ SD  | $\rho \pm$ SD    |
| Indonesia (Lesser Sunda Islands) | 6,700 $\pm$ 3,100      | 0.351 $\pm$ 0.16 | 5,150 $\pm$ 1,600     | 0.268 $\pm$ 0.08 |                     |                  |                    |                  |
| Timor                            | 4,050 $\pm$ 2,900      | 0.211 $\pm$ 0.15 | 3,050 $\pm$ 1,200     | 0.158 $\pm$ 0.06 | 59,600 $\pm$ 16,050 | 3.109 $\pm$ 0.84 | 26,000 $\pm$ 9,250 | 1.356 $\pm$ 0.48 |
| Philippines                      | 3,850 $\pm$ 2,500      | 0.200 $\pm$ 0.13 | 950 $\pm$ 600         | 0.048 $\pm$ 0.03 |                     |                  |                    |                  |
| Taiwan                           | 4,000 $\pm$ 1,800      | 0.210 $\pm$ 0.09 |                       |                  |                     |                  |                    |                  |
| Aboriginals<br>New Guinea        |                        |                  |                       |                  | 53,700 $\pm$ 11,850 | 2.8 $\pm$ 0.62   | 38,900 $\pm$ 8,350 | 2.03 $\pm$ 0.43  |

Note: Dates before present (BP) are rounded to the nearest 50 years.

**Supplementary Table 11: Time to the Most Recent Common Ancestor (TMRCA) of selected Y chromosome haplogroups in individuals from Indonesia, Philippines (Aeta), Oceania and Australia using Batwing<sup>†</sup>**

| Y Chromosome Haplogroup | TMRCA (95% Confidence Interval)<br>Years BP |
|-------------------------|---------------------------------------------|
| C-RPS4Y                 | 41,650 (17,850 – 92,100)                    |
| C-M38                   | 32,950 (14,350 – 70,850)                    |
| C-P343                  | 16,000 (6,500 – 36,550)                     |
| C-P355                  | 13,600 (5,600 – 30,200)                     |
| C-M347                  | 15,900 (5,950 – 39,550)                     |
| M-P256                  | 30,600 (13,100 – 66,600)                    |
| S-M230                  | 22,750 (9,750 – 49,300)                     |

Note: Dates before present (BP) are rounded to the nearest 50 years.

<sup>†</sup> <http://www.mas.ncl.ac.uk/~nijw/#batwing>



**Supplementary Table 12: A list of new Y chromosome markers, position, primer information and reference SNP ID**

| <b>SNP</b> | <b>Haplogroup</b> | <b>Y-position<br/>(GRCh37/<br/>hg19)</b> | <b>Forward Primer</b>     | <b>Reverse Primer</b>     | <b>PCR<br/>Size<br/>(bp)</b> | <b>Mutation</b> | <b>Site<br/>(bp)</b> | <b>Strand</b> |
|------------|-------------------|------------------------------------------|---------------------------|---------------------------|------------------------------|-----------------|----------------------|---------------|
| P343       | C                 | 2,815,407                                | ATGAACAGAATGAATTAAATGGT   | TATGTTGTAAGATGAAAAATGT    | 360                          | Cdel            | 85                   | Positive      |
| P355       | C                 | 22,077,527                               | AATCTCCTGCCCTGAATGACTGTCC | TATCCTGTAATCCTTTGTGAGCCTC | 399                          | G→A             | 250                  | Negative      |
| P377       | S                 | 5,847,373                                | CAAAAAGTGGGCAATCAGATGACT  | ATTTTATTCATTTTTATGGCTGAG  | 513                          | A→G             | 258                  | Positive      |

**Supplementary Figure 1: Language groups spoken on the island of Timor  
(adopted from Therik, 2004)**

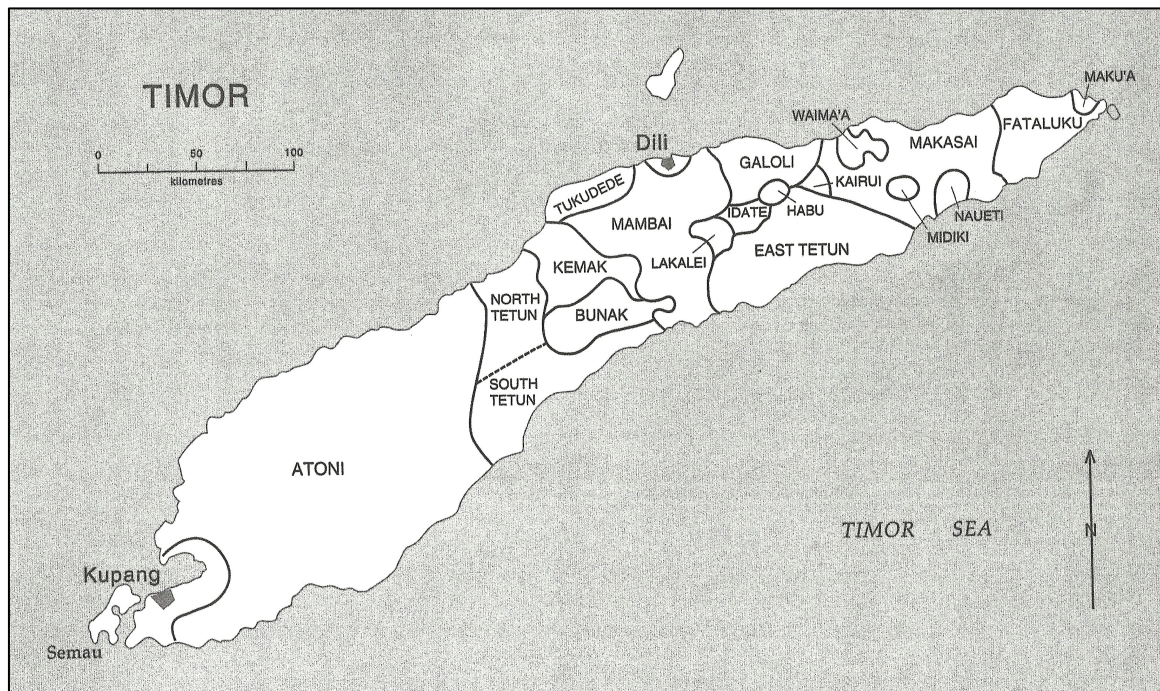

**Supplementary Figure 2: Maximum Parsimony tree of Y chromosome haplogroups in West Timor**

a) Simplified tree showing lineages from the D and E trunk onward.

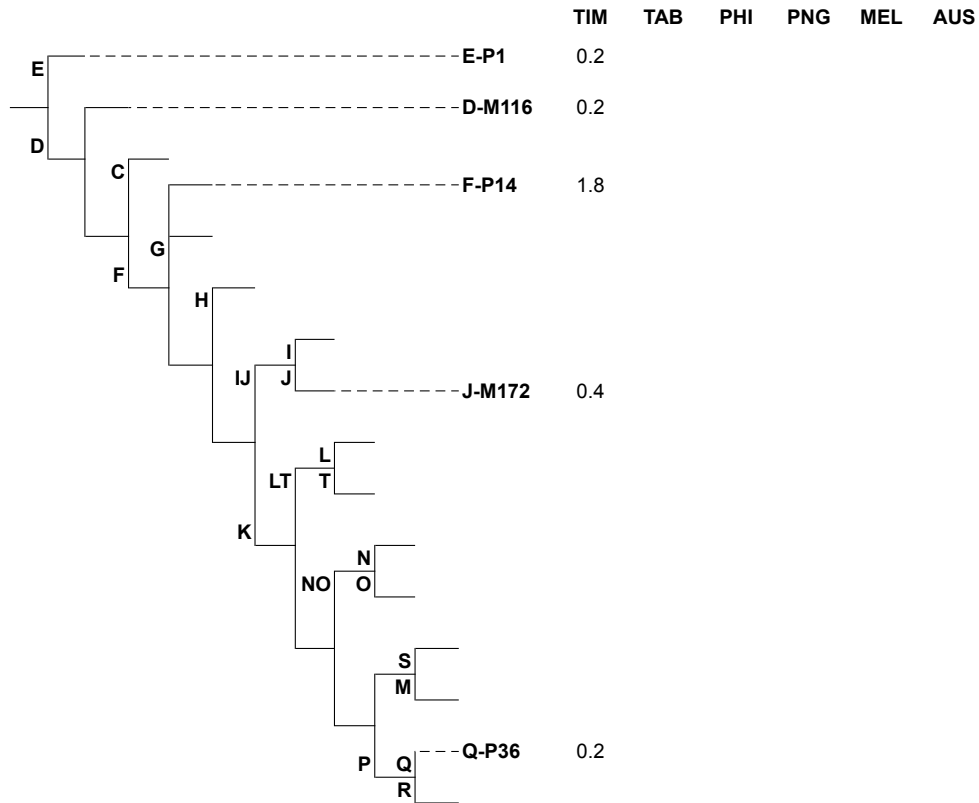

b) Detailed tree of C lineages (including newly reported haplogroups in red).

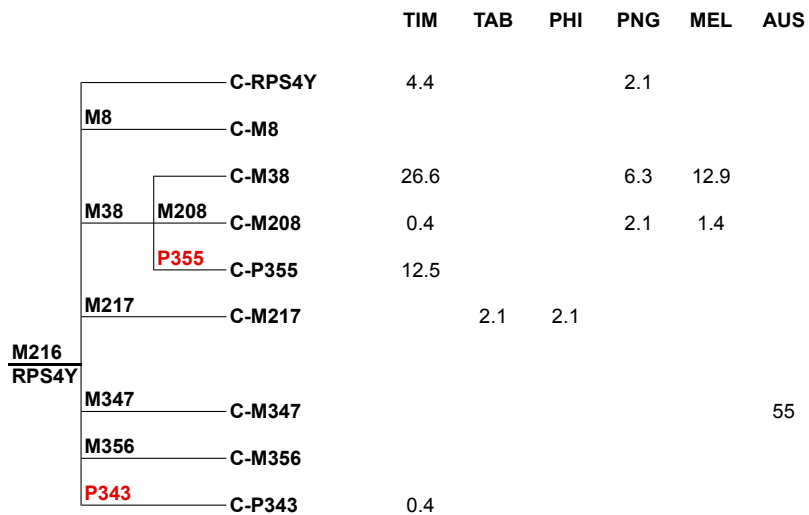

Supplementary Figure 2 continued

c) Lineages from the K trunk (including recently reported haplogroups by Karafet and colleagues, *in press*, in purple)

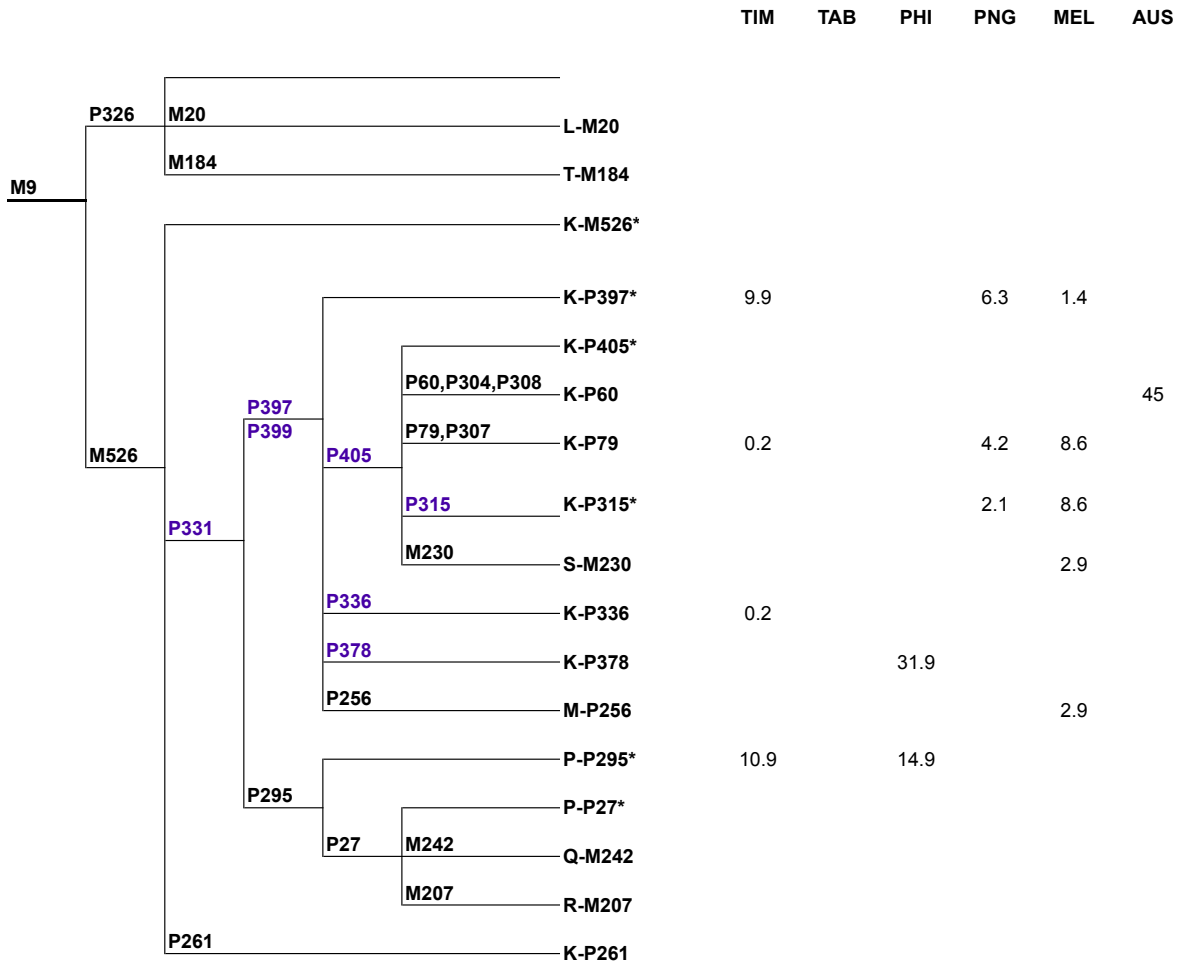

Supplementary Figure 2 *continued*

d) Lineages O, M and S (including a newly reported haplogroup in red)

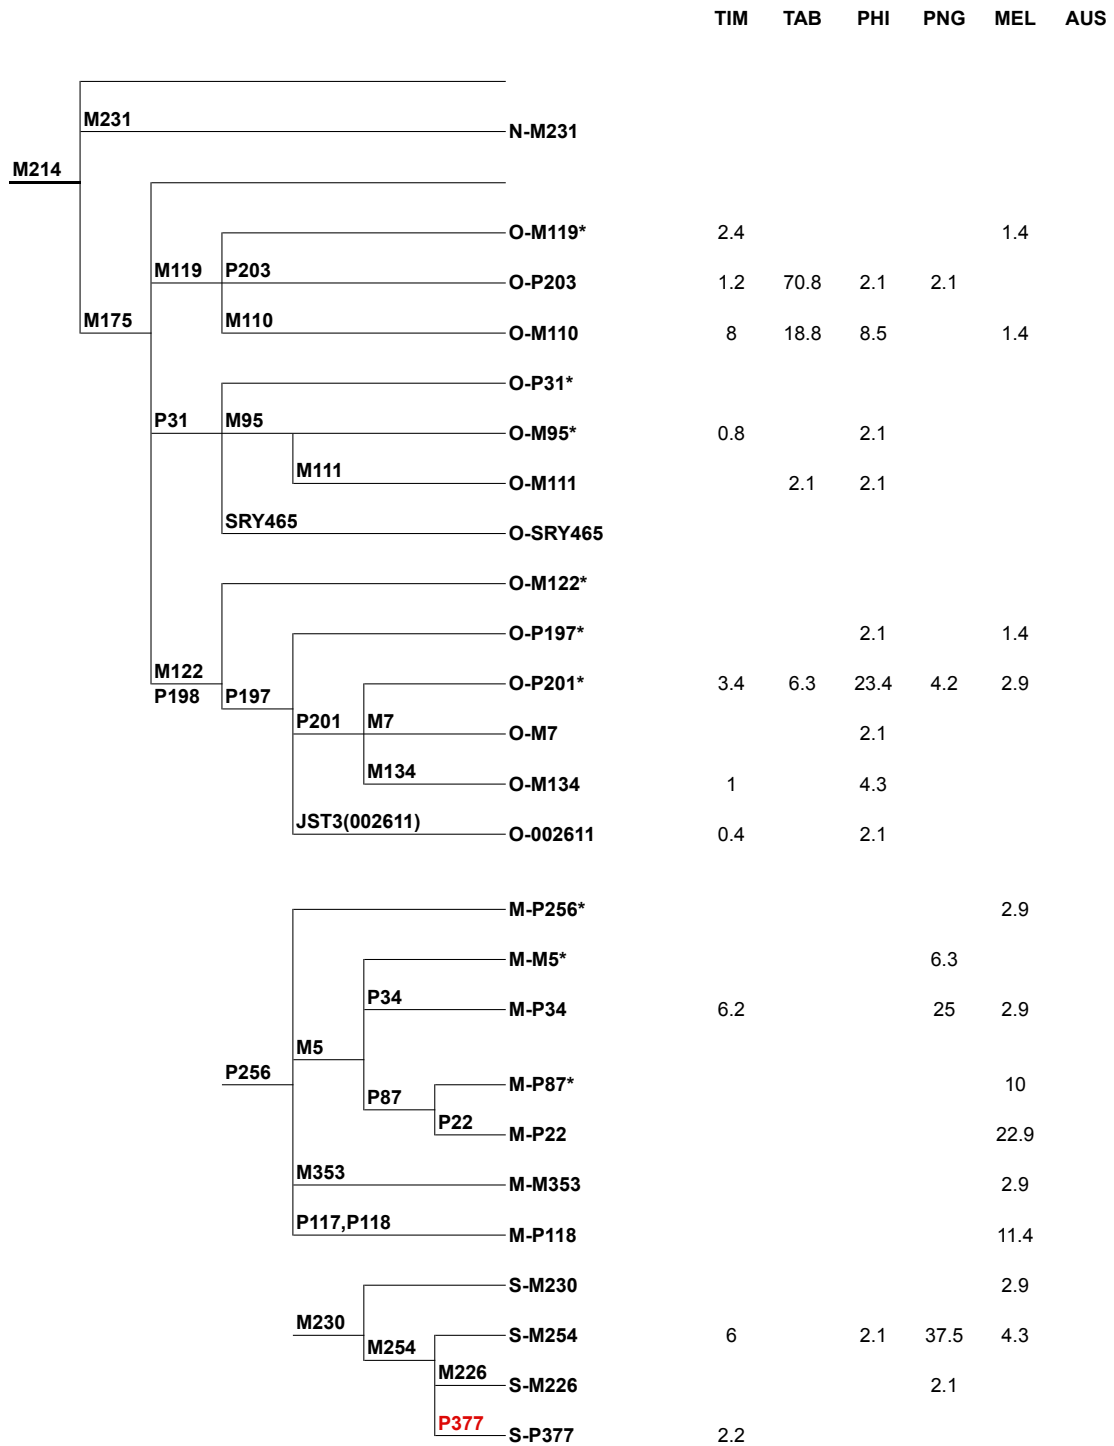

**Supplementary Figure 3: Phylogeny of mitochondrial DNA haplogroups observed in Indonesian populations (adapted from Tumonggor et al., 2013). Open circles: mtDNA lineages found in West Timor.**

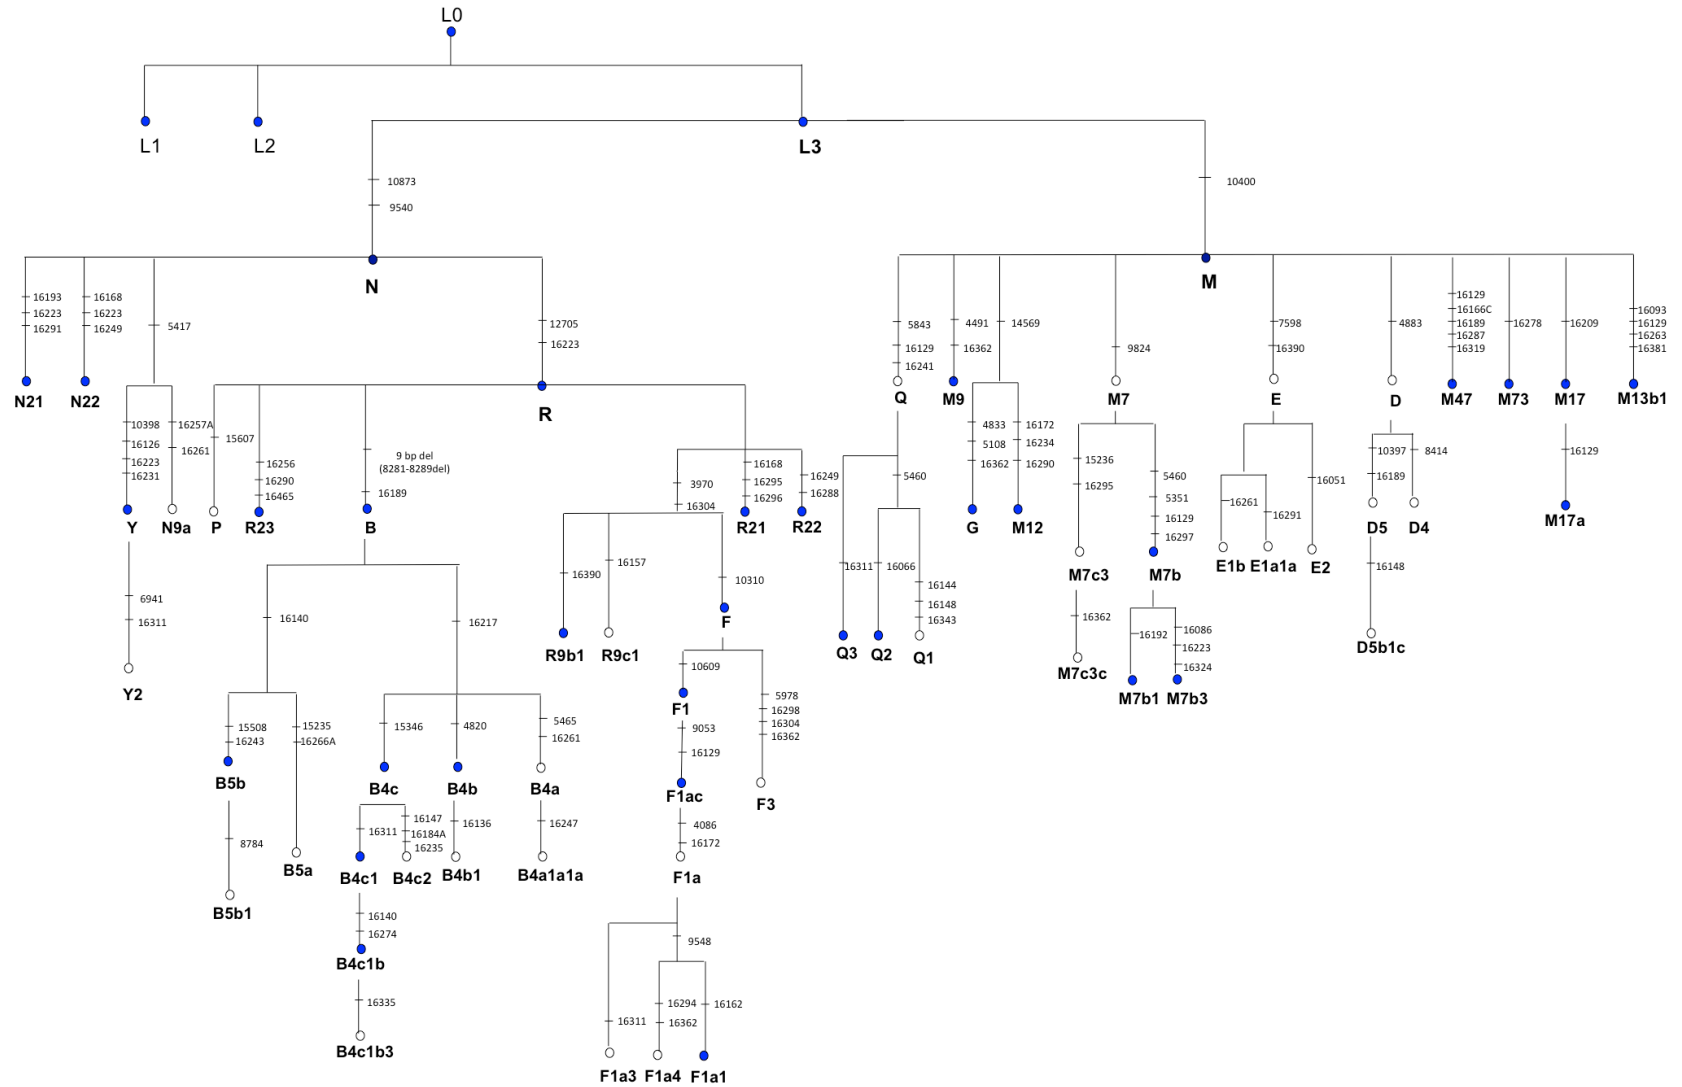

**Supplementary Figure 4: Distribution and network of mtDNA haplogroups (a) F1a4 and (b) Q in West Timor.** Populations: (1) Fatuketi, (2) Umaklaran, (3) Tialai, (4) Raimanawe, (5) Kamanasa, (6) Kateri, (7) Kakaniuk, (8) Laran, (9) Kletek Rainan, (10) Kletek Suai, (11) Kletek Wefatuk, (12) Umanen Lawalu, and (13) Besikama.

(a)

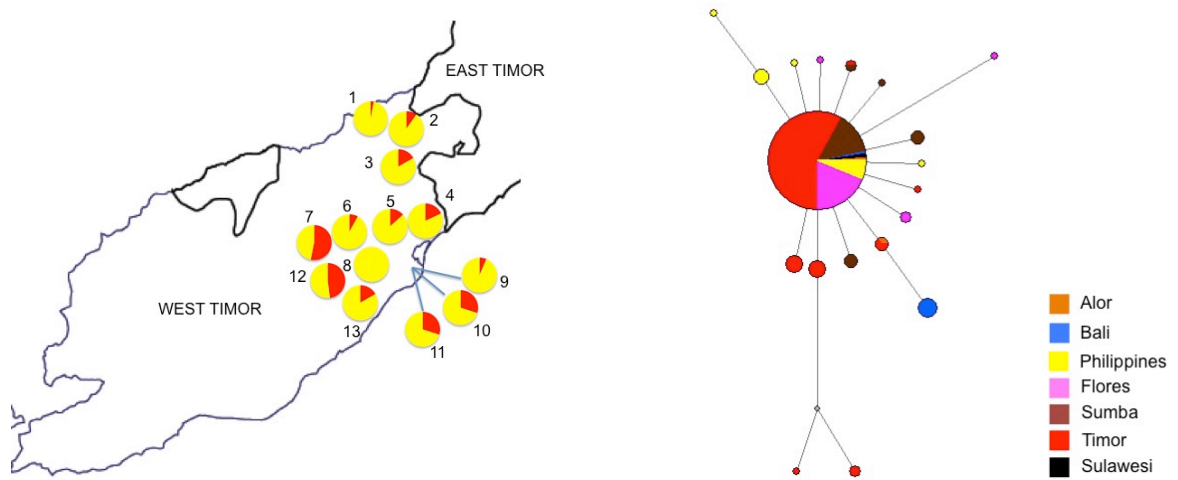

(b)

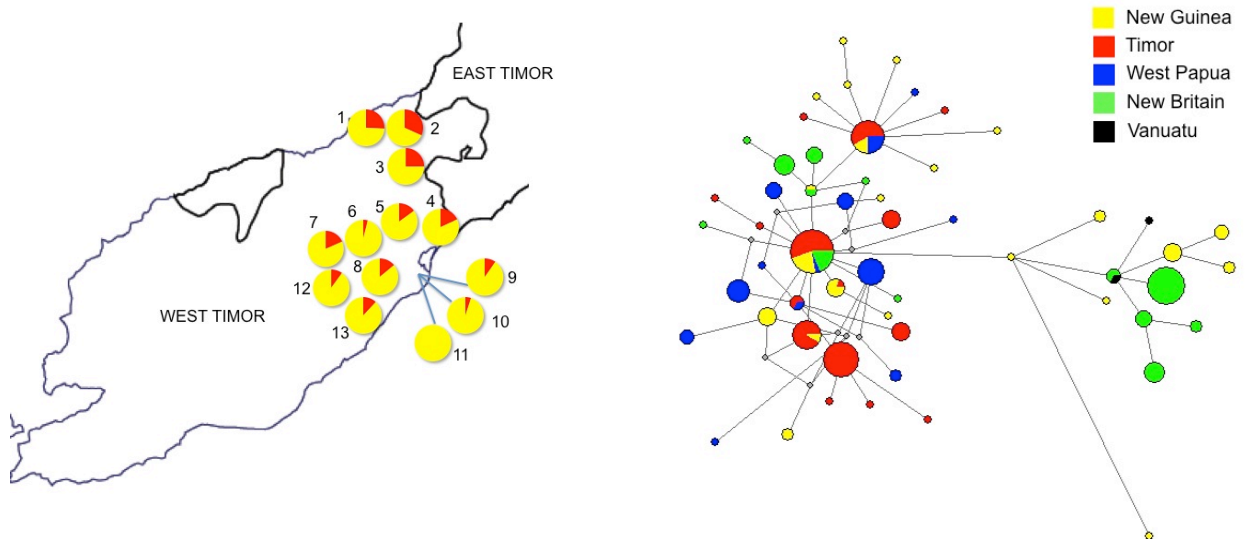

Supplementary Figure 5: Network of Y chromosome haplogroup O-M110

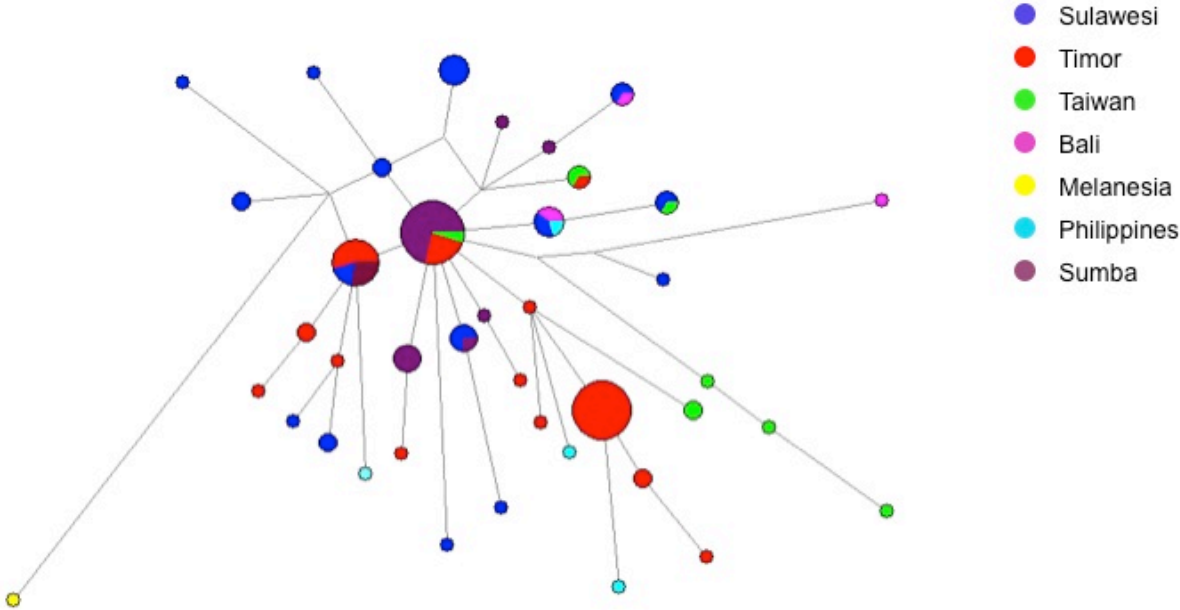



## Supplementary Text 1: DNA Extraction and Genetic Screening

DNA was extracted from peripheral blood samples using the salting-out procedure of Miller, Dykes and Polesky<sup>68</sup>. DNA from buccal swabs was extracted using standard phenol-chloroform protocols.

The first hypervariable segment (HVS I) of mitochondrial DNA was amplified using primers L15926 (5'-TCAAAGCTTACACCAGTCTTGTAACC-3') and H639 (5'-GGGTGATGTGAGCCCGTCA-3'). PCR amplicons were sequenced in both forward and reverse directions using primers L15965 (5'-CAAGGACAAATCAGAGAA-3') and H11 (5'-GTGGTTAATAGGGTGATAG-3'). Traditional Sanger sequences were aligned and edited with Sequencher® v. 5.0 (Gene Codes Corporation, Ann Arbor, MI, USA; <http://www.genecodes.com>). Polymorphisms were scored relative to the revised Cambridge reference sequence (rCRS)<sup>69</sup>. Haplogroups were initially predicted from HVS I sequences using known reference genomes<sup>30, 41, 59, 70-73</sup>. Assignments were subsequently confirmed using Taqman and Restriction Fragment Length Polymorphism (RFLP) assays (as described in Tumonggor and colleagues<sup>6</sup>). For mtDNA comparative analysis, we used previously published data from the following geographic regions: surrounding Indonesian islands<sup>6, 59</sup>, the Philippines<sup>41</sup>, indigenous Taiwanese<sup>74</sup>, New Guinea and Melanesian populations<sup>42</sup>, and Australian aboriginals<sup>45</sup>.

Polymorphic sites from the non-recombining portion of the human Y chromosome (NRY) included a set of 85 binary markers published previously<sup>14, 40</sup> and three newly discovered mutations: C-P355, C-P343 and S-P377. Information about these new mutations is provided in **Supplementary Table 12** and their phylogenetic positions are shown in **Supplementary Figure 2**. We use the mutation-based naming system recommended by the Y Chromosome Consortium<sup>75, 76</sup>. We analyzed 14 Y chromosome short tandem repeats (STRs) (DYS19, DYS385a, DYS385b, DYS388, DYS389I, DYS389CD, DYS390, DYS391, DYS392, DYS393, DYS426, DYS438, DYS457, and TAGA or DYS439+4) using methods described by Redd and colleagues<sup>77</sup>. Additional populations were included for comparative analysis of the Y chromosome data: indigenous Taiwanese ( $n = 48$ ), Filipinos ( $n = 47$ ), Papua New Guineans ( $n = 48$ ), Melanesians ( $n = 70$ ) and Australians ( $n = 40$ ).

## ADDITIONAL REFERENCES

- 68 Miller, S. A., Dykes, D. D., Polesky, H. F. A simple salting out procedure for extracting DNA from human nucleated cells. *Nucl Acids Res* 16: 1215 (1988).
- 69 Andrews, R.M., Kubacka, I., Chinnery, P.F., Lightowlers, R.N., Turnbull, D.M., Howell, N. Reanalysis and revision of the Cambridge reference sequence for human mitochondrial DNA. *Nat Genet* 23: 147 (1999).
- 70 Tanaka, M., Cabrera, V. M., Gonzalez, A. M., Larruga, J. M., Takeyasu, T., Fuku, N., Guo, L. J., Hirose, R., Fujita, Y., Kurata, M., Shinoda, K., Umetsu, K., Yamada, Y., Oshida, Y., Sato, Y., Hattori, N., Mizuno, Y., Arai, Y., Hirose, N., Ohta, S., Ogawa, O., Tanaka, Y., Kawamori, R., Shamoto-Nagai, M., Maruyama, W., Shimokata, H., Suzuki, R., and Shimodaira, H. Mitochondrial genome variation in eastern Asia and the peopling of Japan. *Genome Res* 14: 1832-1850 (2004).
- 71 Kong, Q. P., Yao, Y. G., Sun, C., Bandelt, H. J., Zhu, C. L., Zhang, Y. P. Phylogeny of east Asian mitochondrial DNA lineages inferred from complete sequences. *Am J Hum Genet* 73: 671-676 (2003).
- 72 Friedlaender, J., Gentz, F., Friedlaender, F., Kaestle, F., Schurr, T., Koki, G., Schanfield, M., McDonough, J., Smith, L., Cerchio, S., Mgone, C., and Merriwether, D. A. Mitochondrial genetic diversity and its determinants in Island Melanesia. In *Papuan Pasts: Cultural, Linguistic and Biological Histories of Papuan-Speaking Peoples*, A. Pawley, R. Attenborough, J. Golson, and R. Hide, eds. Canberra, Pacific Linguistics, pp 693-716 (2005).
- 73 van Oven, M. Revision of the mtDNA tree and corresponding haplogroup nomenclature. *Proc Natl Acad Sci USA* 107: E38-E39 (2010).
- 74 Trejaut, J. A., Kivisild, T., Loo, J. H., Lee, C. L., He, C. L., Hsu, C. J., and Li, Z. Y. Traces of archaic mitochondrial lineages persist in Austronesian-speaking Formosan populations. *PLoS Biol* 3: e247 (2005).
- 75 Y Chromosome Consortium. A nomenclature system for the tree of human Y-chromosomal binary haplogroups. *Genome Res* 12: 339-348 (2002).
- 76 Karafet, T.M., Mendez, F.L., Meilerman, M.B., Underhill, P.A., Zegura, S.L., Hammer, M.F. New binary polymorphisms reshape and increase resolution of the human Y chromosomal haplogroup tree. *Genome Res* 18: 830-838 (2008).
- 77 Redd, A.J., Agellon, A.B., Kearney, V.A., Contreras, V.A., Karafet, T., Park, H., de Knijff, P., Butler, J.M., Hammer, M.F. Forensic value of 14 novel STRs on the human Y chromosome. *Forensic Sci Int* 130: 97-111 (2002).
